# Supplementary material
Source: PubMed Central journal article supplement (PMC6439596)
Supplement: jama-321-869-s005.pdf [file jama-321-869-s005.pdf]

## Data Sharing Statement

Ma J, Rosas LG, Lv N, et al. Effect of integrated behavioral weight loss treatment and problem solving therapy on body mass index and depressive symptoms among patients with obesity and depression: the RAINBOW randomized clinical trial. *JAMA*. doi:10.1001/jama.2019.0557

### Data

**Data available:** Yes

**Data types:** Other (please specify)

**Additional Information:** Deidentified trial participant data

**How to access data:** The data will be made available.

**When available:** January 1, 2020

### Supporting Documents

**Document types:** Data dictionary

### Additional Information

**Who can access the data:** We would make the data and associated documentation available to users only under a formal data sharing and use agreement that provides for a commitment to the following: (1) using the data only for research purposes and not to identify any individual participant, (2) securing the data using appropriate computer technology, (3) destroying or returning the data after analyses are completed, (4) accepting reporting responsibilities, (5) abiding by restrictions on redistribution of the data for commercial purposes or to third parties, and (6) proper acknowledgement of the data resource.

**Types of analyses:** For research purposes only.

**Mechanisms of data availability:** Appropriate fees may be assessed upon mutual agreement on requests for information in a format other than that we intend to provide. We will not be responsible for providing any analytical support.
